# Supplementary material for: Heterotachy in Mammalian Promoter Evolution
Source: PLOS journal article supplement (doi:10.1371/journal.pgen.0020030), 2006-04-20

Figure S1

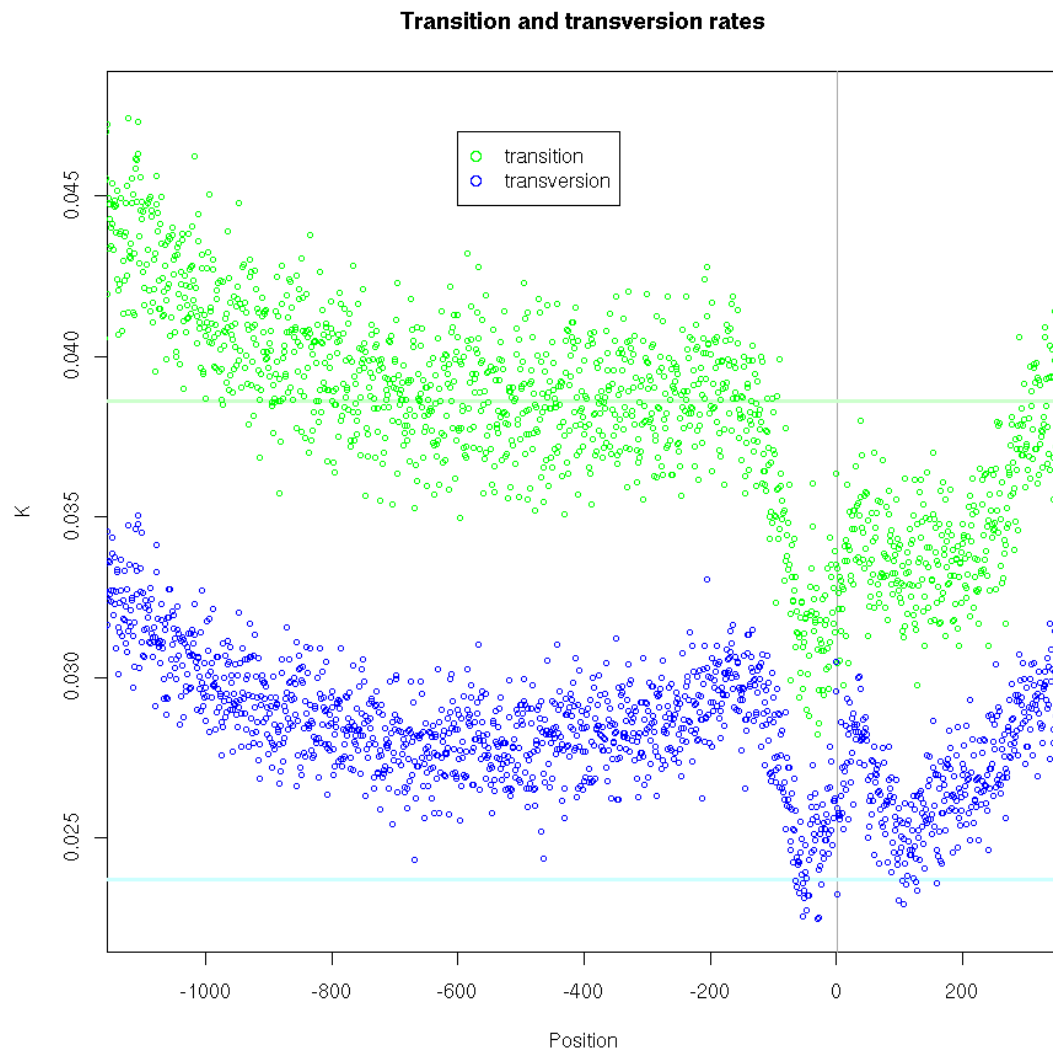

Supplement: S1 (10.1371/journal.pgen.0020030.s001) [file journal.pgen.0020030.s001]
