# Supplementary material for: Heterotachy in Mammalian Promoter Evolution
Source: PLOS journal article supplement (doi:10.1371/journal.pgen.0020030), 2006-04-20

**Figure S2**

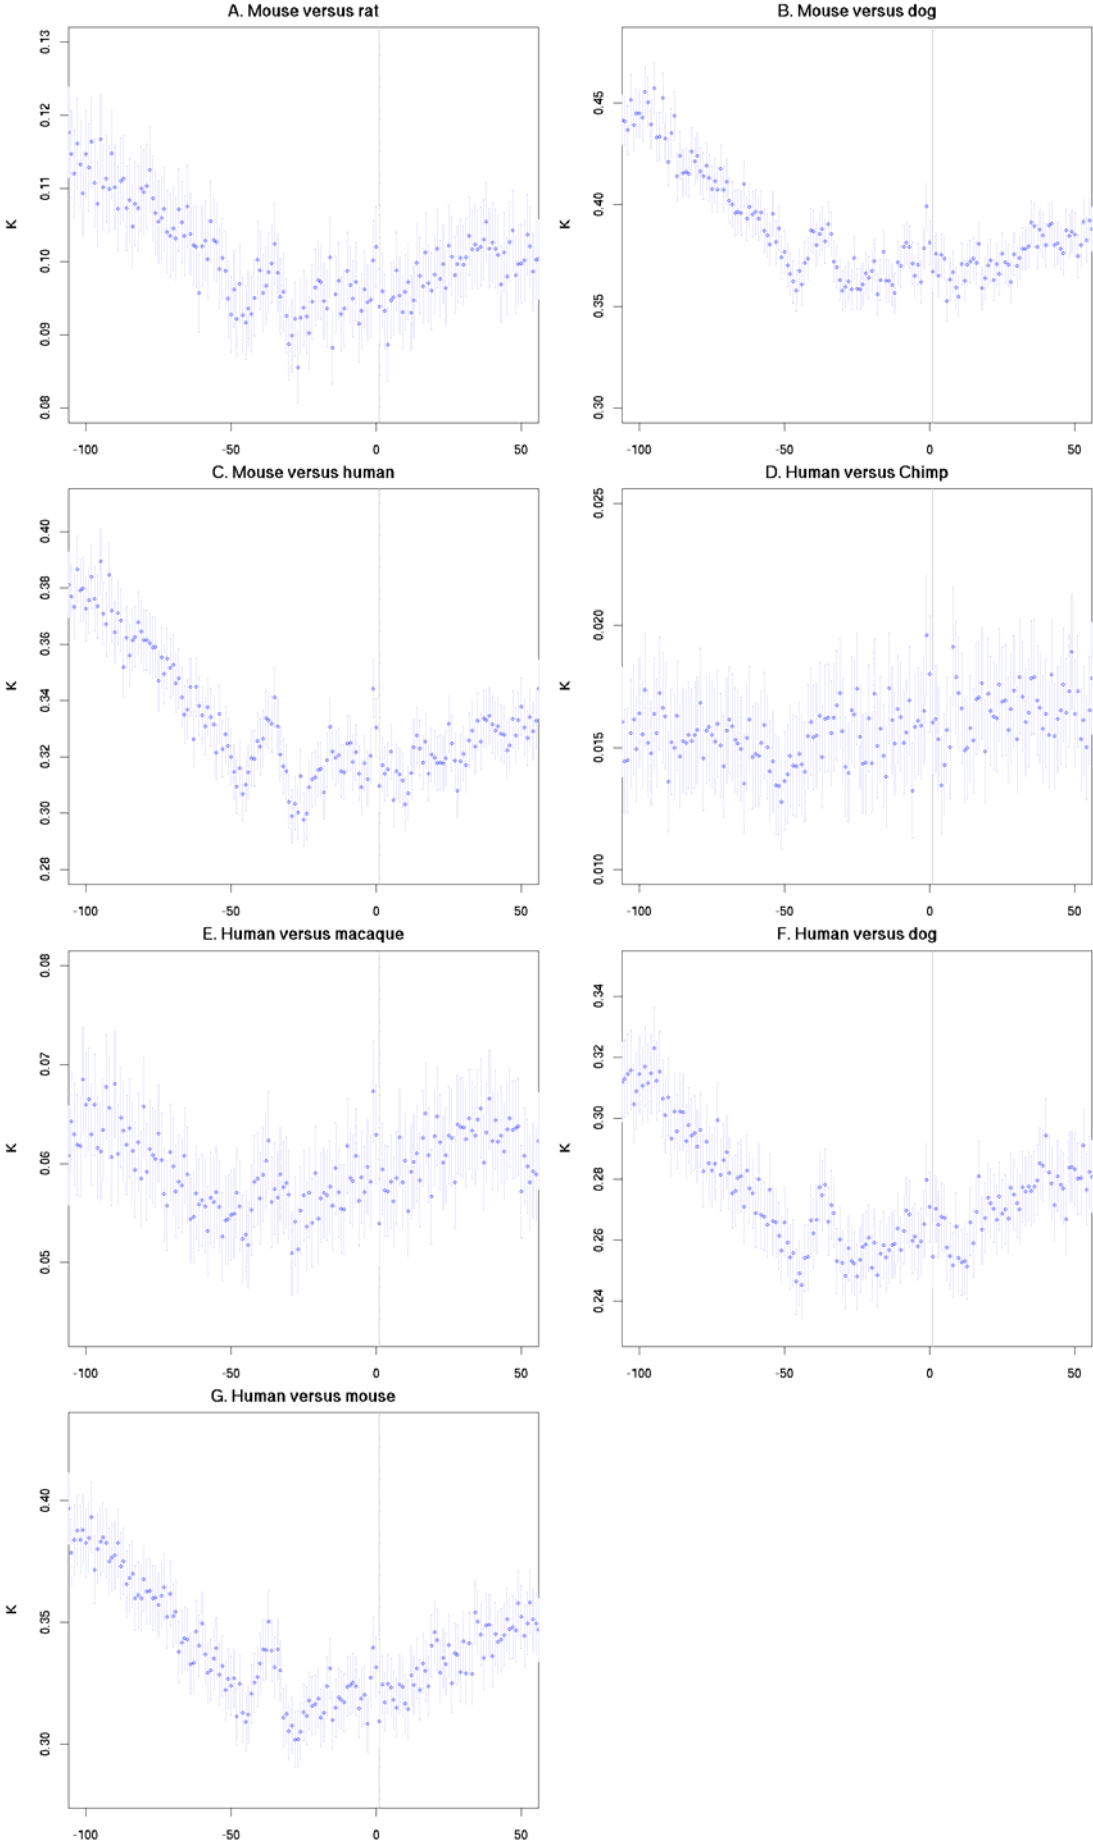

Supplement: S2 (10.1371/journal.pgen.0020030.s002) [file journal.pgen.0020030.s002]
